# Supplementary material for: Inactivation of Hepatitis B Virus Replication in Cultured Cells and In Vivo with Engineered Transcription Activator-Like Effector Nucleases
Source: PubMed Central journal article supplement — Mol Ther. 2013 Aug 20;21(10):1889–97. doi: 10.1038/mt.2013.170 (PMC3808145; doi:10.1038/mt.2013.170), 2013-08-20
Supplement: mt2013170x1.pdf [file mt2013170x1.pdf]

S TALENs

(411) TCCTGCTGCTATGCCTCAT

CTTCTGGACTATCAAGGTA

Genotype

A1 (AY233288) (391) TTTTATCATATTCCTCTTCA TCCTGCTGCTATGCCTCAT CTTCTTATTGGTT CTTCTGGAT TATCAAGGTA TGTGCCCCGTTTGCCTCTA  
A2 (X70185) (391) TTTTATCATATTCCTCTTCA TCCTGCTGCTATGCCTCAT CTTCTTATTGGTT CTTCTGGAT TATCAAGGTA TGTGCCCCGTTTGCCTCTA  
A3 (AB194950) (391) TTTTATCATATTCCTCTTCA TCCTGCTGCTATGCCTCAT CTTCTTATTGGTT CTTCTGGACTATCAAGGTA TGTGCCCCGTTTGCCTCTA  
B1 (AB073851) (391) TTTTATCATCTTCCTCTGCA TCCTGCTGCTATGCCTCAT CTTCTTATTGGTT CTTCTGGACTATCAAGGTA TGTGCCCCGTTTGCCTCTA  
B2 (AF121245) (391) TTTTATCATCTTCCTCTGCA TCCTGCTGCTATGCCTCAT CTTCTTATTGGTT CTTCTGGACTATCAAGGTA TGTGCCCCGTTTGCCTCTA  
B3 (EF473977) (391) TTTTATCATCTTCCTCTGCA TCCTGCTGCTATGCCTCAT CTTCTTATTGGTT CTTCTGGACTATCAAGGTA TGTGCCCCGTTTGCCTCTA  
B4 (AB115551) (391) TTTTATCATCTTCCTCTGCA TCCTGCTGCTATGCCTCAT CTTCTTATTGGTT CTTCTGGACTATCAAGGTA TGTGCCCCGTTTGCCTCTA  
B5 (AB219428) (391) TTTTATCATATTCCTCTGCA TCCTGCTGCTATGCCTCAT CTTCTTATTGGTT CTTCTGGACTATCAAGGTA TGTGCCCCGTTTGCCTCTA  
B6 (AB287316) (391) TTTTATCATCTTCCTTTGCA TCCTGCTGCTATGCCTCAT CTTCTTATTGGTT CTTCTGGACTATCAAGGTA TGTGCCCCGTTTGCCTCTA  
C1 (DQ089760) (391) TTTTATCATCTTCCTCTTCA TCCTGCTGCTATGCCTCAT CTTCTTATTGGTT CTTCTGGACTATCAAGGTA TGTGCCCCGTTTGCCTCTA  
C2 (AB365451) (391) TTTTATCATATTCCTCTTCA TCCTGCTGCTATGCCTCAT CTTCTTATTGGTT CTTCTGGACTATCAAGGTA TGTGCCCCGTTTGCCTCTA  
C3 (X75665) (391) TTTTATCATCTTCCTCTTCA TCCTGCTGCTATGCCTCAT CTTCTTATTGGTT CTTCTGGACTATCAAGGTA TGTGCCCCGTTTGCCTCTA  
C4 (AB048704) (391) TTTTATCATCTTCCTCTTCA TCCTGCTGCTATGCCTCAT CTTCTTATTGGTT CTTCTGGACTATCAAGGTA TGTGCCCCGTTTGCCTCTA  
C5 (EU410079) (391) TTTTATCATATTCCTCTTCA TCCTGCTGCTATGCCTCAT CTTCTTATTGGTT CTTCTGGACTATCAAGGTA TGTGCCCCGTTTGCCTCTA  
C6 (AB493837) (391) TTTTATCATCTTCCTCTTCA TCCTGCTGCTATGCCTCAT CTTCTTATTGGTT CTTCTGGACTATCAAGGTA TGTGCCCCGTTTGCCTCTA  
D1 (AB246348) (391) TTTTATCATCTTCCTCTTCA TCCTGCTGCTATGCCTCAT CTTCTTATTGGTT CTTCTGGACTATCAAGGTA TGTGCCCCGTTTGCCTCTA  
D2 (EU594416) (391) TTTTATCATCTTCCTCTTCA TCCTGCTGCTATGCCTCAT CTTCTTATTGGTT CTTCTGGACTATCAAGGTA TGTGCCCCGTTTGCCTCTA  
D3 (EU594435) (391) TTTTATCATCTTCCTCTTCA TCCTGCTGCTATGCCTCAT CTTCTTATTGGTT CTTCTGGACTATCAAGGTA TGTGCCCCGTTTGCCTCTA  
D4 (AB033559) (391) TTTTATCATCTTCCTCTTCA TCCTGCTGCTATGCCTCAT CTTCTTATTGGTT CTTCTGGACTATCAAGGTA TGTGCCCCGTTTGCCTCTA  
E (AM494708) (391) TTTTATCATCTTCCTCTTCA TCCTGCTGCTATGCCTCAT CTTCTTATTGGTT CTTCTGGACTATCAAGGTA TGTGCCCCGTTTGCCTCTA  
F1 (AY090458) (384) TTTTATCATATTCCTCTTCA TCCTGCTGCTATGCCTCAT CTTCTTATTGGTT CTTCTGGACTATCAAGGTA TGTGCCCCGTTTGCCTCTA  
F2 (AY311369) (391) TTTTATCATCTTCCTCTTCA TCCTGCTGCTATGCCTCAT CTTCTTATTGGTT CTTCTGGACTATCAAGGTA TGTGCCCCGTTTGCCTCTA  
F3 (AB036909) (391) TTTTATCATCTTCCTCTTCA TCCTGCTGCTATGCCTCAT CTTCTTATTGGTT CTTCTGGACTATCAAGGTA TGTGCCCCGTTTGCCTCTA  
F4 (AF223965) (391) TTTTATCATCTTCCTCTTCA TCCTGCTGCTATGCCTCAT CTTCTTATTGGTT CTTCTGGACTATCAAGGTA TGTGCCCCGTTTGCCTCTA  
G (AB375168) (391) TTTTATCATATTCCTCTTCA TCCTGCTGCTATGCCTCAT CTTCTTATTGGTT CTTCTGGACTATCAAGGTA TGTGCCCCGTTTGCCTCTG  
H (AY090457) (394) TTTTATCATCTTCCTCTTCA TCCTGCTGCTATGCCTCAT CTTCTTATTGGTT CTTCTGGACTATCAAGGTA TGTGCCCCGTTTGCCTCTA  
pCH 9/3091 (1673) TTTTATCATCTTCCTCTTCA TCCTGCTGCTATGCCTCAT CTTCTTATTGGTT CTTCTGGACTATCAAGGTA TGTGCCCCGTTTGCCTCTA

Surface F I I F L F I L L L C L I F L L V L L D Y Q G M L P V C P L  
Polymerase F Y H L P L H P A A M P H L L V G S S G L S R Y V A R L S S

**Figure S1.** Comparison of HBV genotype sequences in the region targeted by the S TALEN. On the top row, the two 19 nucleotide sequences in the HBV plus strand that are targeted by each of the left and right subunits comprising the complete TALEN are highlighted in yellow. HBV genome coordinate of the first T residue of the left subunit target is underlined in parentheses. Cognates from HBV isolates, with 20 nt flanking on either side, are shown below. HBV genotypes, subgenotypes, accession numbers, pCH9/3091 and first nucleotide coordinate of each sequence are provided on the left in bold. Sequences within the S TALEN targets that are conserved in each of the genotypes are also highlighted in yellow. Adjacent amino acid sequences of Surface and Polymerase, by the pCH9/3091 plasmid, are shown on the bottom two rows. Individual amino acids are aligned to the first nucleotide of each codon.

**C TALENs** (2319) TATCAACACTTCCGGAGAC CGACG-----AGGCAGGTCCCCTA

**Genotype**

**A1 (AY233288) (2301)** CACCAAATGCCCTATCTTATCAACACTTCCGGAAACTACTGTTGTTAGACGACGAGACCGAGGCAGGTCCCCTAGAAGAAGAACTCCCTCGCCTCGCAG

**A2 (X70185) (2301)** CACCAAATGCCCTATCTTATCAACACTTCCGGAAACTACTGTTGTTAGACGACGGACCGAGGCAGGTCCCCTAGAAGAAGAACTCCCTCGCCTCGCAG

**A3 (AB194950) (2301)** CACCAAATGCCCTATCTTATCAACACTTCCGAAACTACTGTTGTTAGACGACGGACCGAGGCAGGTCCCCTAGAAGAAGAACTCCCTCGCCTCGCAG

**Core/HBeAg** P N A P I L S T L P E T T V L R R R D R G R S P R R R T P S P R R

**Polymerase (X70185)** - - M P L S Y Q H F R R L L F L D D G T E A G P L E E E L P R L A

**C TALEN** (2319) TATCAACACTTCCGGAGAC CGACGAGGCAGGTCCCCTA

**B1 (AB073851) (2301)** CACCAAATGCCCTATCTTATCAACACTTCCGGAGACTACTGTTGTTAGACGACGAGGCAGGTCCCCTAGAAGAAGAACTCCCTCGCCTCGCAG

**B2 (AF121245) (2301)** CACCAAATGCCCTATCTTATCAACACTTCCGGAAACTACTGTTGTTAGACGAAAGAGGCAGGTCCCCTAGAAGAAGAACTCCCTCGCCTCGCAG

**B3 (EF473977) (2301)** CACCAAATGCCCTATCTTATCAACACTTCCGGAGACTACTGTTGTTAGACGACGAGGCAGGTCCCCTAGAAGAAGAACTCCCTCGCCTCGCAG

**B4 (AB115551) (2301)** CACCAAATGCCCTATCTTATCAACACTTCCGGAAACTACTGTTGTTAGACGACGAGGCAGGTCCCCTAGAAGAAGAACTCCCTCGCCTCGCAG

**B5 (AB219428) (2301)** CACCAAATGCCCTATCTTATCCACACTTCCGGAAACTACTGTTGTTAGACGAAAGAGGCAGGTCCCCTAGAAGAAGAACTCCCTCGCCTCGCAG

**B6 (AB287316) (2301)** CACCAAATGCCCTATCTTATCAACACTTCCGGAAACTACTGTTGTTAGACGACGAGTCAGGTCCCCTAGAAGAAGAACTCCCTCGCCTCGCAG

**C1 (DQ089760) (2301)** CACCAAATGCCCTATCTTATCAACACTTCCGGAAACTACTGTTGTTAGACGACGAGGCAGGTCCCCTAGAAGAAGAACTCCCTCGCCTCGCAG

**C2 (AB365451) (2301)** CACCAAATGCCCTATCTTATCAACACTTCCGGAAACTACTGTTGTTAGACGACGAGGCAGGTCCCCTAGAAGAAGAACTCCCTCGCCTCGCAG

**C3 (X75665) (2301)** CACCAAATGCCCTATCTTATCAACACTTCCGGAAACTACTGTTGTTAGACGAAAGAGGCAGGTCCCCTAGAAGAAGAACTCCCTCGCCTCGCAG

**C4 (AB048704) (2301)** CACCAAATGCCCTATCTTATCAACACTTCCGGAAACTACTGTTGTTAGACGACGAGGCAGGTCCCCTAGAAGAAGAACTCCCTCGCCTCGCAG

**C5 (EU410079) (2301)** CACCAAATGCCCTATCTTATCAACACTTCCGGAAACTACTGTTGTTAGACGACGAGGCAGGTCCCCTAGAAGAAGAACTCCCTCGCCTCGCAG

**C6 (AB493837) (2301)** CACCAAATGCCCTATCTTATCAACACTTCCGGAAACTACTGTTGTTAGACGACGAGGCAGGTCCCCTAGAAGAAGAACTCCCTCGCCTCGCAG

**D1 (AB246348) (2301)** CACCAAATGCCCTATCTTATCAACACTTCCGGAGACTACTGTTGTTAGACGACGAGGCAGGTCCCCTAGAAGAAGAACTCCCTCGCCTCGCAG

**D2 (EU594416) (2301)** CACCAAATGCCCTATCTTATCAACACTTCCGGAGACTACTGTTGTTAGACGACGAGGCAGGTCCCCTAGAAGAAGAACTCCCTCGCCTCGCAG

**D3 (EU594435) (2301)** CACCAAATGCCCTATCTTATCAACACTTCCGGAGACTACTGTTGTTAGACGACGAGGCAGGTCCCCTAGAAGAAGAACTCCCTCGCCTCGCAG

**D4 (AB033559) (2301)** CACCAAATGCCCTATCTTATCAACACTTCCGGAGACTACTGTTGTTAGACGACGAGGCAGGTCCCCTAGAAGAAGAACTCCCTCGCCTCGCAG

**E (AM494708) (2301)** CACCAAATGCCCTATCTTATCAACACTTCCGGAAACTACTGTTGTTAGACGAAAGAGGCAGGTCCCCTAGAAGAAGAACTCCCTCGCCTCGCAG

**F1 (AY090458) (2304)** CACCAAATGCCCTATCTTATCCACACTTCCGGAAACTACTGTTGTTAGACGAAAGAGGCAGGTCTCCTCGAAGAAGAACTCCCTCGCCTCGCAG

**F2 (AY311369) (2301)** CACCAAATGCCCTATCTTATCCACACTTCCGGAAACTACTGTTGTTAGACGACGAGGCAGGTCCCCTAGAAGAAGAACTCCCTCGCCTCGCAG

**F3 (AB036909) (2301)** CACCAAATGCCCTATCTTATCCACACTTCCGGAAACTACTGTTGTTAGACGAAAGAGGCAGGTCCCCTAGAAGAAGAACTCCCTCGCCTCGCCG

**F4 (AF223965) (2301)** CACCAAATGCCCTATCTTATCCACACTTCCGGAAACTACTGTTGTTAGACGACGAGGCAGGTCCCCTAGAAGAAGAACTCCCTCGCCTCGCAG

**G (AB375168) (2337)** CACCAAATGCCCTATCTTATCAACACTTCCGGAGACTACTGTTGTTAGACGAAAGAGGCAGGTCCCCTCGAAGAAGAACTCCCTCGCCTCGCAG

**H (AY090457) (2304)** CACCAAATGCCCTATCTTATCAACACTTCCGGAGACTACTGTTGTTAGACCAACGAGGCAGGTGCCCTAGAAGAAGAACTCCCTCGCCTCGCAG

**pCH 9/3091 (401)** CACCAAATGCCCTATCTTATCAACACTTCCGGAGACTACTGTTCTTAGACGACGAGGCAGGTCCCCTAGAAGAAGAACTCCCTCGCCTCGCAG

**Core/HBeAg** P N A P I L S T L P E T T V L R R R G R S P R R R T P S P R

**Polymerase** - - M P L S Y Q H F R R L L F L D D E A G P L E E E L P R L A

**Figure S2.** Comparison of HBV genotype sequences in the region targeted by the C TALEN. The sequences are depicted using a similar format to that described in Figure S1. HBV genotype A isolates have an additional 6 nucleotides in the in the sequence targeted by the right TALEN subunit.

|                      |               |                           |                     |               |                   |   |   |   |   |   |   |   |   |   |   |   |   |   |   |   |   |   |   |   |   |   |   |   |   |   |   |   |   |   |
|----------------------|---------------|---------------------------|---------------------|---------------|-------------------|---|---|---|---|---|---|---|---|---|---|---|---|---|---|---|---|---|---|---|---|---|---|---|---|---|---|---|---|---|
| <b>P1 TALENs</b>     |               | (1144)                    | TACCCCGTTGCCCGGCAAC |               | CCAAGTGTGCTGACGCA |   |   |   |   |   |   |   |   |   |   |   |   |   |   |   |   |   |   |   |   |   |   |   |   |   |   |   |   |   |
| <b>Genotype</b>      |               |                           |                     |               |                   |   |   |   |   |   |   |   |   |   |   |   |   |   |   |   |   |   |   |   |   |   |   |   |   |   |   |   |   |   |
| <b>A1 (AY233288)</b> | <b>(1119)</b> | TCTGAGTAAACAGTATATGAACCTT | TACCCCGTTGCCCGGCAAC | GGCCTGGTCTGTG | CCAAGTGTGCTGACGCA |   |   |   |   |   |   |   |   |   |   |   |   |   |   |   |   |   |   |   |   |   |   |   |   |   |   |   |   |   |
| <b>A2 (X70185)</b>   | <b>(1119)</b> | TCTAAGTAAACAGTACATGAACCTT | TACCCCGTTGCTCGGCAAC | GGCCTGGTCTGTG | CCAAGTGTGCTGACGCA |   |   |   |   |   |   |   |   |   |   |   |   |   |   |   |   |   |   |   |   |   |   |   |   |   |   |   |   |   |
| <b>A3 (AB194950)</b> | <b>(1119)</b> | TCTAAGTAAACAGTATATGAACCTT | TACCCCGTTGCCCGGCAAC | GGCCTGGTCTATG | CCAAGTGTGCTGACGCA |   |   |   |   |   |   |   |   |   |   |   |   |   |   |   |   |   |   |   |   |   |   |   |   |   |   |   |   |   |
| <b>B1 (AB073851)</b> | <b>(1119)</b> | TCTAAGTAAACAGTATATGACCCTT | TACCCCGTTGCTCGGCAAC | GGCCTGGTCTGTG | CCAAGTGTGCTGACGCA |   |   |   |   |   |   |   |   |   |   |   |   |   |   |   |   |   |   |   |   |   |   |   |   |   |   |   |   |   |
| <b>B2 (AF121245)</b> | <b>(1119)</b> | TTTAAGTAAACAGTATCTGAACCTT | TACCCCGTTGCTCGGCAAC | GGCCTGGTCTGTG | CCAAGTGTGCTGACGCA |   |   |   |   |   |   |   |   |   |   |   |   |   |   |   |   |   |   |   |   |   |   |   |   |   |   |   |   |   |
| <b>B3 (EF473977)</b> | <b>(1119)</b> | TCTAAGCAAACAATATCTGAACCTT | TACCCCGTTGCTCGGCAAC | GGCCAGGTCTGTG | CCAAGTGTGCTGACGCA |   |   |   |   |   |   |   |   |   |   |   |   |   |   |   |   |   |   |   |   |   |   |   |   |   |   |   |   |   |
| <b>B4 (AB115551)</b> | <b>(1119)</b> | TTTAAGTAAACAGTATCTGAACCTT | TACCCCGTTGCTCGGCAAC | GGCCTGGTCTATG | CCAAGTGTGCTGACGCA |   |   |   |   |   |   |   |   |   |   |   |   |   |   |   |   |   |   |   |   |   |   |   |   |   |   |   |   |   |
| <b>B5 (AB219428)</b> | <b>(1119)</b> | TCTACACAAACAGTATTTGAACCTT | TACCCCGTTGCTCGGCAAC | GGCCAGGTCTGTG | CCAAGTGTGCTGACGCA |   |   |   |   |   |   |   |   |   |   |   |   |   |   |   |   |   |   |   |   |   |   |   |   |   |   |   |   |   |
| <b>B6 (AB287316)</b> | <b>(1119)</b> | TCTAAACAACAATATCTGAACCTT  | TACCCCGTTA          | CGGCAAC       | GGCCAGGTCTGTG     |   |   |   |   |   |   |   |   |   |   |   |   |   |   |   |   |   |   |   |   |   |   |   |   |   |   |   |   |   |
| <b>C1 (DQ089760)</b> | <b>(1119)</b> | TCTGTGTAACAATATCAGAACCTT  | TACCCCGTTGCTCGGCAAC | GGTCAGGTCTTTG | CCAAGTGTGCTGACGCA |   |   |   |   |   |   |   |   |   |   |   |   |   |   |   |   |   |   |   |   |   |   |   |   |   |   |   |   |   |
| <b>C2 (AB365451)</b> | <b>(1119)</b> | TCTGTGTCAACAATACCTGCACCTT | TACCCCGTTGCCCGGCAAC | GGTCAGGCCTCTG | CCAAGTGTGCTGACGCA |   |   |   |   |   |   |   |   |   |   |   |   |   |   |   |   |   |   |   |   |   |   |   |   |   |   |   |   |   |
| <b>C3 (X75665)</b>   | <b>(1119)</b> | TCTGTGTAACAATATCTGAACCTT  | TACCCCGTTGCCCGGCAAC | GGTCTGGTCTTTG | CCAAGTGTGCTGACGCA |   |   |   |   |   |   |   |   |   |   |   |   |   |   |   |   |   |   |   |   |   |   |   |   |   |   |   |   |   |
| <b>C4 (AB048704)</b> | <b>(1119)</b> | TCTGTGTAACAATATCTGAACCTT  | TACCCCGTTGCCCGGCAAC | GGCTGGTCTCTG  | CCAAGTGTGCTGACGCA |   |   |   |   |   |   |   |   |   |   |   |   |   |   |   |   |   |   |   |   |   |   |   |   |   |   |   |   |   |
| <b>C5 (EU410079)</b> | <b>(1119)</b> | TCTGTGTAACAATATTTGACCCTT  | TACCCCGTTGCTCGGCAAC | GGCCAGGTCTATG | CCAAGTGTGCTGATGCA |   |   |   |   |   |   |   |   |   |   |   |   |   |   |   |   |   |   |   |   |   |   |   |   |   |   |   |   |   |
| <b>C6 (AB493837)</b> | <b>(1119)</b> | TCTGTGTCAACAATATTTGCACCTT | TACCCCGTTGCCCGGCAAC | GGTCTGGTCTTTG | CCAAGTGTGCTGACGCA |   |   |   |   |   |   |   |   |   |   |   |   |   |   |   |   |   |   |   |   |   |   |   |   |   |   |   |   |   |
| <b>D1 (AB246348)</b> | <b>(1119)</b> | TCTGTGTAACAATACATGACCCTT  | TACCCCGTTGCCCGGCAAC | GGCCAGGTCTGTG | CCAAGTGTGCTGACGCA |   |   |   |   |   |   |   |   |   |   |   |   |   |   |   |   |   |   |   |   |   |   |   |   |   |   |   |   |   |
| <b>D2 (EU594416)</b> | <b>(1119)</b> | TCTGTGTAACAATATCTGAACCTT  | TACCCCGTTGCCCGGCAAC | GGCCAGGTCTGTG | CCAAGTGTGCTGACGCA |   |   |   |   |   |   |   |   |   |   |   |   |   |   |   |   |   |   |   |   |   |   |   |   |   |   |   |   |   |
| <b>D3 (EU594435)</b> | <b>(1119)</b> | TCTGTATAACAATACCTGAACCTT  | TACCCCGTTGCCCGGCAAC | GGCCAGGTCTGTG | CCAAGTGTGCTGACGCA |   |   |   |   |   |   |   |   |   |   |   |   |   |   |   |   |   |   |   |   |   |   |   |   |   |   |   |   |   |
| <b>D4 (AB033559)</b> | <b>(1119)</b> | TCTGTGTAACAATACCTGAACCTT  | TACCCCGTTGCTCGGCAAC | GGCCAGGTCTGTG | CCAAGTGTGCTGATGCA |   |   |   |   |   |   |   |   |   |   |   |   |   |   |   |   |   |   |   |   |   |   |   |   |   |   |   |   |   |
| <b>E (AM494708)</b>  | <b>(1119)</b> | TCTGTGTAACAATACCTGAACCTT  | TACCCCGTTGCCCGGCAAC | GGCCCGGTCTGTG | CCAAGTGTGCTGATGCA |   |   |   |   |   |   |   |   |   |   |   |   |   |   |   |   |   |   |   |   |   |   |   |   |   |   |   |   |   |
| <b>F1 (AY090458)</b> | <b>(1122)</b> | TCTATGTCAACAATACATGAACCTT | TACCCCGTTGCTCGGCAAC | GGCCAGGCCTGTG | CCAAGTGTGCTGACGCA |   |   |   |   |   |   |   |   |   |   |   |   |   |   |   |   |   |   |   |   |   |   |   |   |   |   |   |   |   |
| <b>F2 (AY311369)</b> | <b>(1119)</b> | TCTGTGTAACAATACATGAACCTT  | TACCCCGTTGCTCGGCAAC | GGCCAGGCCTGTG | CCAAGTGTGCTGACGCA |   |   |   |   |   |   |   |   |   |   |   |   |   |   |   |   |   |   |   |   |   |   |   |   |   |   |   |   |   |
| <b>F3 (AB036909)</b> | <b>(1119)</b> | TCTCTGTAAACAATACATGAACCTT | TACCCCGTTGCTCGGCAAC | GGCCAGGCCTGTG | CCAAGTGTGCTGACGCA |   |   |   |   |   |   |   |   |   |   |   |   |   |   |   |   |   |   |   |   |   |   |   |   |   |   |   |   |   |
| <b>F4 (AF223965)</b> | <b>(1119)</b> | TCTCTGTAAACAGTACATGAACCTT | TACCCCGTTGCTCGGCAAC | GGCCAGGCCTGTG | CCAAGTGTGCTGACGCA |   |   |   |   |   |   |   |   |   |   |   |   |   |   |   |   |   |   |   |   |   |   |   |   |   |   |   |   |   |
| <b>G (AB375168)</b>  | <b>(1119)</b> | TCTCTGTAAACAATACATGAACCTT | TACCCCGTTGCTAGGCAAC | GGCCCGGTCTGTG | CCAAGTGTGCTGACGCA |   |   |   |   |   |   |   |   |   |   |   |   |   |   |   |   |   |   |   |   |   |   |   |   |   |   |   |   |   |
| <b>H (AY090457)</b>  | <b>(1122)</b> | TCTCTGTAAACAATACATGAACCTT | TACCCCGTTGCTCGGCAAC | GGCCAGGCCTTTG | CCAAGTGTGCTGACGCA |   |   |   |   |   |   |   |   |   |   |   |   |   |   |   |   |   |   |   |   |   |   |   |   |   |   |   |   |   |
| <b>pCH 9/3091</b>    | <b>(2401)</b> | TCTGTGTAACAATACCTGAACCTT  | TACCCCGTTGCCCGGCAAC | GGCCAGGTCTGTG | CCAAGTGTGCTGACGCA |   |   |   |   |   |   |   |   |   |   |   |   |   |   |   |   |   |   |   |   |   |   |   |   |   |   |   |   |   |
| <b>Polymerase</b>    |               | L                         | C                   | K             | Q                 | Y | L | N | L | Y | P | V | A | R | Q | R | P | G | L | C | Q | V | F | A | D | A | T | P | T | G | W | G | L | V |

**Figure S3.** Comparison of HBV genotype sequences in the region targeted by the P1 TALEN. The sequences are depicted using a similar format to that described in Figure S1.

|                             |                      |         |                            |                |                            |               |                   |               |              |                  |                         |                        |             |          |          |          |          |          |          |          |          |          |          |          |          |          |          |          |          |          |          |          |
|-----------------------------|----------------------|---------|----------------------------|----------------|----------------------------|---------------|-------------------|---------------|--------------|------------------|-------------------------|------------------------|-------------|----------|----------|----------|----------|----------|----------|----------|----------|----------|----------|----------|----------|----------|----------|----------|----------|----------|----------|----------|
| <b>P2 TALENs</b>            |                      | (1299)  | <b>TCGCAGCAGGTCTGGAGCA</b> |                | <b>TGATAACTCTGTTGTCCTA</b> |               |                   |               |              |                  |                         |                        |             |          |          |          |          |          |          |          |          |          |          |          |          |          |          |          |          |          |          |          |
| <b>Genotype</b>             |                      |         |                            |                |                            |               |                   |               |              |                  |                         |                        |             |          |          |          |          |          |          |          |          |          |          |          |          |          |          |          |          |          |          |          |
| <b>A1 (AY233288) (1274)</b> | CGGAACTCCTAGCTGCTTGT | TTTTGC  | <b>TCGCAGC</b>             | <b>CGGC</b>    | <b>CTGGAGCA</b>            | <b>AAACT</b>  | <b>CATCGGGAC</b>  | <b>TGATAA</b> | <b>TCTGT</b> | <b>CGTCCT</b>    | <b>TTCTCGGAAATATA</b>   | <b>CATC</b>            |             |          |          |          |          |          |          |          |          |          |          |          |          |          |          |          |          |          |          |          |
| <b>A2 (X70185) (1274)</b>   | CGGAACTCCTAGCCGCTTGT | TTTTGC  | <b>TCGCAGC</b>             | <b>CGGTCT</b>  | <b>GGAGCA</b>              | <b>AAAGCT</b> | <b>CATCGGAACT</b> | <b>TGACA</b>  | <b>AAT</b>   | <b>TCTGT</b>     | <b>CGTCCT</b>           | <b>CTCGCGGAAATATA</b>  | <b>CATC</b> |          |          |          |          |          |          |          |          |          |          |          |          |          |          |          |          |          |          |          |
| <b>A3 (AB194950) (1274)</b> | CGGAACTCCTAGCAGCTTGT | TTTTGC  | <b>TCGCAGC</b>             | <b>CGGTCT</b>  | <b>GGAGCA</b>              | <b>AAACT</b>  | <b>CATCGGGAC</b>  | <b>TGATAA</b> | <b>TCTGT</b> | <b>CGTCCT</b>    | <b>TTCTCGGAAATATA</b>   | <b>CATC</b>            |             |          |          |          |          |          |          |          |          |          |          |          |          |          |          |          |          |          |          |          |
| <b>B1 (AB073851) (1274)</b> | CGGAACTCCTAGCCGCTTGT | TTTTGC  | <b>TCGCAGC</b>             | <b>CAGGTCT</b> | <b>GGAGC</b>               | <b>GAAACT</b> | <b>CATCGGGAC</b>  | <b>TGACA</b>  | <b>AAT</b>   | <b>TCTGT</b>     | <b>CGTGCT</b>           | <b>CTCCCGCAAGTATA</b>  | <b>CATC</b> |          |          |          |          |          |          |          |          |          |          |          |          |          |          |          |          |          |          |          |
| <b>B2 (AF121245) (1274)</b> | CGGAACTCCTAGCCGCTTGT | TTTTGC  | <b>TCGCAGC</b>             | <b>CAGGTCT</b> | <b>GGAGC</b>               | <b>AAACT</b>  | <b>CATCGGGAC</b>  | <b>TGACA</b>  | <b>AAT</b>   | <b>TCTGT</b>     | <b>CGTACT</b>           | <b>CTCCCGCAAGTATA</b>  | <b>CAGC</b> |          |          |          |          |          |          |          |          |          |          |          |          |          |          |          |          |          |          |          |
| <b>B3 (EF473977) (1274)</b> | CGGAACTCCTAGCCGCTTGT | TTTTGC  | <b>TCGCAGC</b>             | <b>CAGGTCT</b> | <b>GGAGC</b>               | <b>AAACT</b>  | <b>CATCGGGAC</b>  | <b>TGACA</b>  | <b>AAT</b>   | <b>TCTGT</b>     | <b>CGTCCT</b>           | <b>TTCCCGCAAATATA</b>  | <b>CATC</b> |          |          |          |          |          |          |          |          |          |          |          |          |          |          |          |          |          |          |          |
| <b>B4 (AB115551) (1274)</b> | CGGAACTCCTTGCAGCTTGT | TTTTGC  | <b>TCGCAGC</b>             | <b>CGGTCT</b>  | <b>GGAGCA</b>              | <b>AAACT</b>  | <b>TATCGGGAC</b>  | <b>TGACA</b>  | <b>AAT</b>   | <b>TCTGT</b>     | <b>CGTGCTA</b>          | <b>TCCCGCAAGTATA</b>   | <b>CATC</b> |          |          |          |          |          |          |          |          |          |          |          |          |          |          |          |          |          |          |          |
| <b>B5 (AB219428) (1274)</b> | CGGAACTCCTAGCTGCTTGT | TTTTGC  | <b>TCGCAGC</b>             | <b>CAGGTCT</b> | <b>GGAGC</b>               | <b>GAAACT</b> | <b>TATCGGGACC</b> | <b>GATAA</b>  | <b>TCTGT</b> | <b>CGTCCT</b>    | <b>TGTCCCGTAAATATA</b>  | <b>CATC</b>            |             |          |          |          |          |          |          |          |          |          |          |          |          |          |          |          |          |          |          |          |
| <b>B6 (AB287316) (1274)</b> | CGGAACTCCTAGCCGCTTGT | TTTTGC  | <b>TCGCAGC</b>             | <b>CAGGTCT</b> | <b>GGAGC</b>               | <b>GAACT</b>  | <b>CATCGGGAC</b>  | <b>TGACA</b>  | <b>AAT</b>   | <b>TCTGT</b>     | <b>CGTCCT</b>           | <b>TTCCCGCAAATATA</b>  | <b>CATC</b> |          |          |          |          |          |          |          |          |          |          |          |          |          |          |          |          |          |          |          |
| <b>C1 (DQ089760) (1274)</b> | CGGAACTCCTAGCAGCTTGT | TTTTGC  | <b>TCGCAGC</b>             | <b>CGGTCT</b>  | <b>GGAGC</b>               | <b>GAACT</b>  | <b>TATCGGGACC</b> | <b>GACA</b>   | <b>AAT</b>   | <b>TCTGT</b>     | <b>CGTCCT</b>           | <b>CTCTCGGAAATACAC</b> | <b>CCTC</b> |          |          |          |          |          |          |          |          |          |          |          |          |          |          |          |          |          |          |          |
| <b>C2 (AB365451) (1274)</b> | CGGAACTCCTAGCAGCTTGT | TTTTGC  | <b>TCGCAGC</b>             | <b>CGGTCT</b>  | <b>GGAGCA</b>              | <b>AAACT</b>  | <b>TATCGGGAC</b>  | <b>TGACA</b>  | <b>AAT</b>   | <b>TCTGT</b>     | <b>CGTCCT</b>           | <b>CTCTCGGAAATACAC</b> | <b>CCTC</b> |          |          |          |          |          |          |          |          |          |          |          |          |          |          |          |          |          |          |          |
| <b>C3 (X75665) (1274)</b>   | CGGAACTCCTAGCGGCTTGT | TTTTGC  | <b>TCGCAGC</b>             | <b>CGGTCT</b>  | <b>GGAGCA</b>              | <b>AACT</b>   | <b>TATCGGAACT</b> | <b>GACA</b>   | <b>AAT</b>   | <b>TCTGT</b>     | <b>CGTCCT</b>           | <b>CTCTCGGAAATACAC</b> | <b>CATC</b> |          |          |          |          |          |          |          |          |          |          |          |          |          |          |          |          |          |          |          |
| <b>C4 (AB048704) (1274)</b> | CGGAACTCCTAGCAGCTTGT | TTTCGC  | <b>TCGCAGC</b>             | <b>CGGTCT</b>  | <b>GGAGC</b>               | <b>GAACAT</b> | <b>TCTCGGGACC</b> | <b>GACA</b>   | <b>AAT</b>   | <b>TCTGT</b>     | <b>TCT</b>              | <b>CTCTCGGAAATACAC</b> | <b>CCTC</b> |          |          |          |          |          |          |          |          |          |          |          |          |          |          |          |          |          |          |          |
| <b>C5 (EU410079) (1274)</b> | CGGAACTCCTTGCAGCCTGT | TTTTGC  | <b>TCGCAGC</b>             | <b>CGGTCT</b>  | <b>GGAGCA</b>              | <b>AACT</b>   | <b>TATAGGAACC</b> | <b>GACA</b>   | <b>AAT</b>   | <b>TCTGT</b>     | <b>CGTCCT</b>           | <b>TTCTCGGAAATACAC</b> | <b>CCTC</b> |          |          |          |          |          |          |          |          |          |          |          |          |          |          |          |          |          |          |          |
| <b>C6 (AB493837) (1274)</b> | CGGAACTCCTAGCAGCTTGT | TTTTGC  | <b>TCGCAGC</b>             | <b>CGGTCT</b>  | <b>GGAGC</b>               | <b>GAACT</b>  | <b>TATCGGAACT</b> | <b>GACA</b>   | <b>AAT</b>   | <b>TCTGT</b>     | <b>CGTCCT</b>           | <b>CTCTCGGAAATACAC</b> | <b>CCTC</b> |          |          |          |          |          |          |          |          |          |          |          |          |          |          |          |          |          |          |          |
| <b>D1 (AB246348) (1274)</b> | CGGAACTCCTAGCCGCTTGT | TTTTGC  | <b>TCGCAGC</b>             | <b>CAGGTCT</b> | <b>GGAGCA</b>              | <b>AACT</b>   | <b>TCTCGGGACC</b> | <b>GATAA</b>  | <b>CTGT</b>  | <b>TCT</b>       | <b>CTCCCGCAAATATA</b>   | <b>CATC</b>            |             |          |          |          |          |          |          |          |          |          |          |          |          |          |          |          |          |          |          |          |
| <b>D2 (EU594416) (1274)</b> | CGGAACTCCTAGCCGCTTGT | TTTTCGC | <b>TCGCAGC</b>             | <b>CAGGTCT</b> | <b>GGAGCA</b>              | <b>AACT</b>   | <b>TCTCGGGACC</b> | <b>GATAA</b>  | <b>CTGT</b>  | <b>TCT</b>       | <b>CTCCCGCAAATATA</b>   | <b>CATC</b>            |             |          |          |          |          |          |          |          |          |          |          |          |          |          |          |          |          |          |          |          |
| <b>D3 (EU594435) (1274)</b> | CGGAACTCCTAGCCGCTTGT | TTTTGC  | <b>TCGCAGC</b>             | <b>CAGGTCT</b> | <b>GGAGCA</b>              | <b>AACT</b>   | <b>TCTCGGGACC</b> | <b>TGATAA</b> | <b>CTGT</b>  | <b>CGTCCT</b>    | <b>CTCCCGCAAATATA</b>   | <b>CATC</b>            |             |          |          |          |          |          |          |          |          |          |          |          |          |          |          |          |          |          |          |          |
| <b>D4 (AB033559) (1274)</b> | CGGAACTCCTAGCCGCTTGT | TTTTGC  | <b>TCGCAGC</b>             | <b>CAGGTCT</b> | <b>GGAGCA</b>              | <b>AACT</b>   | <b>TCTCGGAACT</b> | <b>TGACA</b>  | <b>AAT</b>   | <b>TCTGT</b>     | <b>CGTCCT</b>           | <b>CTCCCGCAAATATA</b>  | <b>CATC</b> |          |          |          |          |          |          |          |          |          |          |          |          |          |          |          |          |          |          |          |
| <b>E (AM494708) (1274)</b>  | CGGAACTCCTAGCCGCTTGT | TTTTGC  | <b>TCGCAGC</b>             | <b>CAGGTCT</b> | <b>GGAGC</b>               | <b>GAACT</b>  | <b>TATCGGGACC</b> | <b>GATAA</b>  | <b>TCTGT</b> | <b>CGTCT</b>     | <b>CTCCCGCAAATATA</b>   | <b>CATC</b>            |             |          |          |          |          |          |          |          |          |          |          |          |          |          |          |          |          |          |          |          |
| <b>F1 (AY090458) (1277)</b> | CAGAACTCCTTGCAGCTTGT | TTTCGC  | <b>TCGCAGC</b>             | <b>CGGTCT</b>  | <b>GGAGC</b>               | <b>GAACT</b>  | <b>CATCGGGACC</b> | <b>GACA</b>   | <b>AAT</b>   | <b>TCTGT</b>     | <b>CGTCCT</b>           | <b>CTCTAGGAAGTACAC</b> | <b>CCTC</b> |          |          |          |          |          |          |          |          |          |          |          |          |          |          |          |          |          |          |          |
| <b>F2 (AY311369) (1274)</b> | CGGAACTCCTAGCAGCTTGT | TTTCGC  | <b>TCGCAGC</b>             | <b>CGGTCT</b>  | <b>GGAGC</b>               | <b>GACTCT</b> | <b>TAATGGCACC</b> | <b>GACA</b>   | <b>AAT</b>   | <b>TCTGT</b>     | <b>CGTCCTA</b>          | <b>TCTAGGAAGTACAC</b>  | <b>CCTC</b> |          |          |          |          |          |          |          |          |          |          |          |          |          |          |          |          |          |          |          |
| <b>F3 (AB036909) (1274)</b> | CGGAACTCCTTGCAGCCTGT | TTTCGC  | <b>TCGCAGC</b>             | <b>CGGTCT</b>  | <b>GGAGC</b>               | <b>GAACAT</b> | <b>TATCGGGACC</b> | <b>GACA</b>   | <b>AAT</b>   | <b>TCTGT</b>     | <b>CGTCCT</b>           | <b>CTCTAGGAAGTACAC</b> | <b>CCTC</b> |          |          |          |          |          |          |          |          |          |          |          |          |          |          |          |          |          |          |          |
| <b>F4 (AF223965) (1274)</b> | CGGAACTCCTTGCAGCTTGT | TTTCGC  | <b>TCGCAGC</b>             | <b>CGGTCT</b>  | <b>GGAGC</b>               | <b>GAATAT</b> | <b>CATCGGGACC</b> | <b>GACA</b>   | <b>AAT</b>   | <b>TCTGT</b>     | <b>CGTACT</b>           | <b>CTCTAGGAAGTACAC</b> | <b>CCTC</b> |          |          |          |          |          |          |          |          |          |          |          |          |          |          |          |          |          |          |          |
| <b>G (AB375168) (1274)</b>  | CGGAACTCCTAGCTGCTTGT | TTTTGC  | <b>TCGCAGC</b>             | <b>CGGTCT</b>  | <b>GGAGCA</b>              | <b>AAACT</b>  | <b>CATTTGGGAC</b> | <b>TGACA</b>  | <b>AAT</b>   | <b>TCTGT</b>     | <b>CGTCCT</b>           | <b>TTCTCGGAAATATA</b>  | <b>CATC</b> |          |          |          |          |          |          |          |          |          |          |          |          |          |          |          |          |          |          |          |
| <b>H (AY090457) (1277)</b>  | CGGAACTCCTAGCAGCTTGT | TTTCGC  | <b>TCGCAGC</b>             | <b>CGGTCT</b>  | <b>GGAGC</b>               | <b>GGACAT</b> | <b>TATCGGGACC</b> | <b>TGACA</b>  | <b>AAT</b>   | <b>CGTTGTCCT</b> | <b>GTCTCGGAAAGTACAC</b> | <b>CCTC</b>            |             |          |          |          |          |          |          |          |          |          |          |          |          |          |          |          |          |          |          |          |
| <b>pCH 9/3091 (2556)</b>    | CGGAACTCCTAGCCGCTTGT | TTTTGC  | <b>TCGCAGC</b>             | <b>CAGGTCT</b> | <b>GGAGCA</b>              | <b>AACT</b>   | <b>TATCGGGACC</b> | <b>TGATAA</b> | <b>CTGT</b>  | <b>CGTCCTA</b>   | <b>TCCCGCAAATATA</b>    | <b>CATC</b>            |             |          |          |          |          |          |          |          |          |          |          |          |          |          |          |          |          |          |          |          |
| <b>Polymerase</b>           |                      |         | <b>E</b>                   | <b>L</b>       | <b>L</b>                   | <b>A</b>      | <b>A</b>          | <b>C</b>      | <b>F</b>     | <b>A</b>         | <b>R</b>                | <b>S</b>               | <b>R</b>    | <b>S</b> | <b>G</b> | <b>A</b> | <b>N</b> | <b>I</b> | <b>I</b> | <b>G</b> | <b>T</b> | <b>D</b> | <b>N</b> | <b>S</b> | <b>V</b> | <b>V</b> | <b>L</b> | <b>S</b> | <b>R</b> | <b>K</b> | <b>Y</b> | <b>T</b> |

**Figure S4.** Comparison of HBV genotype sequences in the region targeted by the P2 TALEN. The sequences are depicted using a similar format to that described in Figure S1.

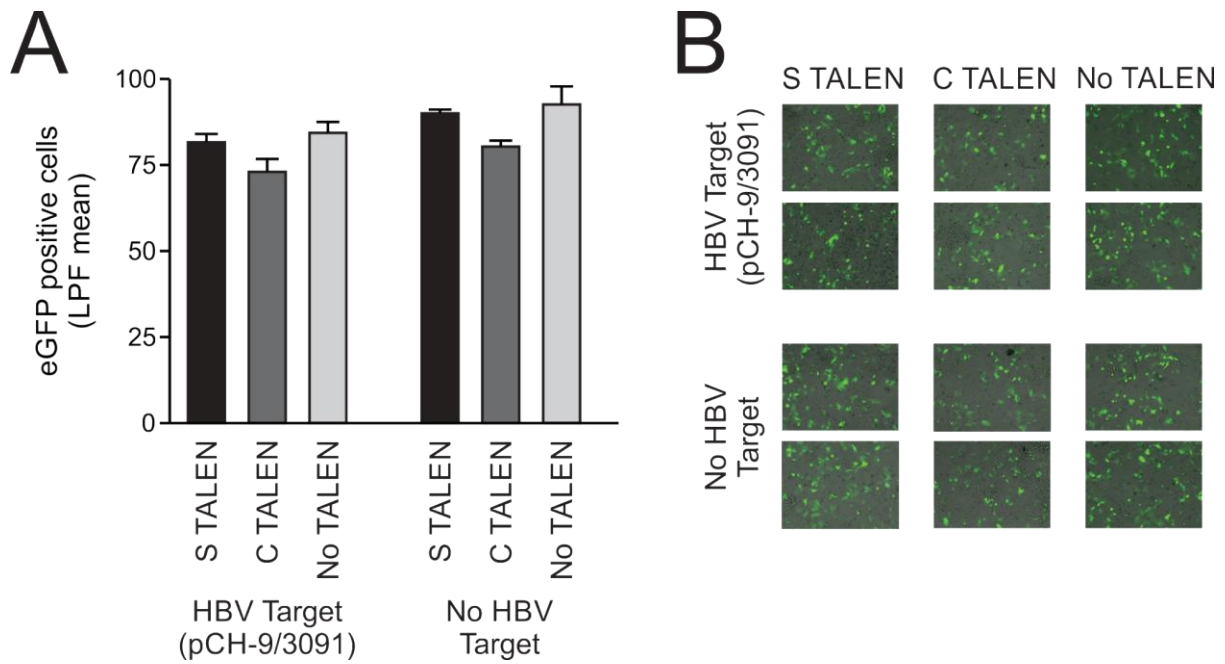

**Figure S5.** Survival assay after co-transfection with GFP- and TALEN-expressing plasmids.

**A.** Following transfection of Huh7 cells with plasmids encoding TALENs and GFP in the presence or absence of HBV target DNA, GFP-positive cells were counted in three representative low power fields (LPF, 100 ×) of experiments performed in triplicate. Mean numbers of fluorescent cells observed are shown with standard errors of the mean indicated by error bars. **B.** Representative low power fields of cells transfected with each of the plasmid combinations.

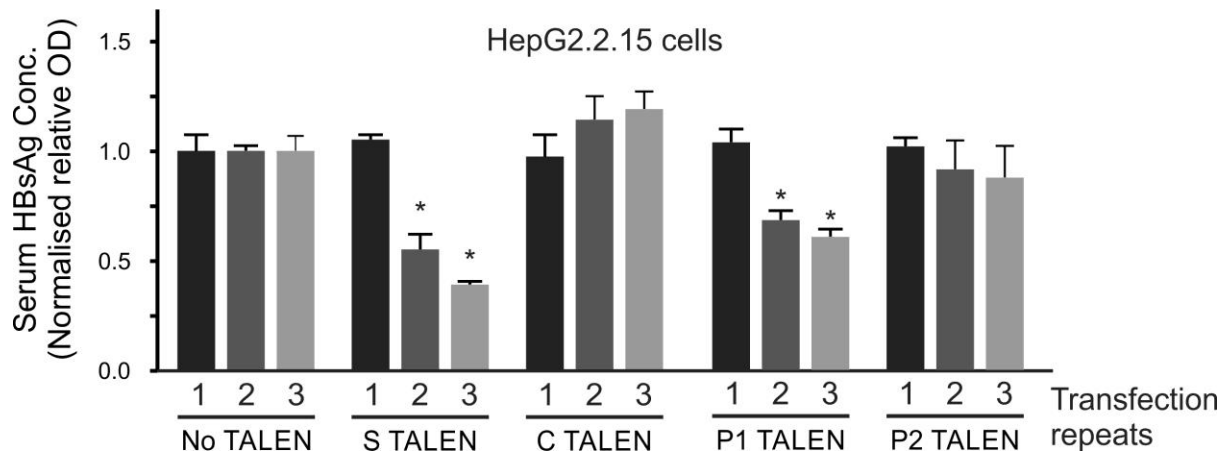

**Figure S6.** HBsAg concentrations in culture supernatants of HepG2.2.15 cells that were subjected to repeat transfections with plasmids encoding each of the panel of 4 HBV-targeting TALENs under hypothermic (30°C) temperatures. Data are represented as the means and the error bars indicate the standard errors of the mean. Statistically significant differences between values obtained after transfection of cells with each of the TALENs and values without TALEN transfection (No TALEN) are indicated by asterisks (\*:  $p < 0.05$ ).





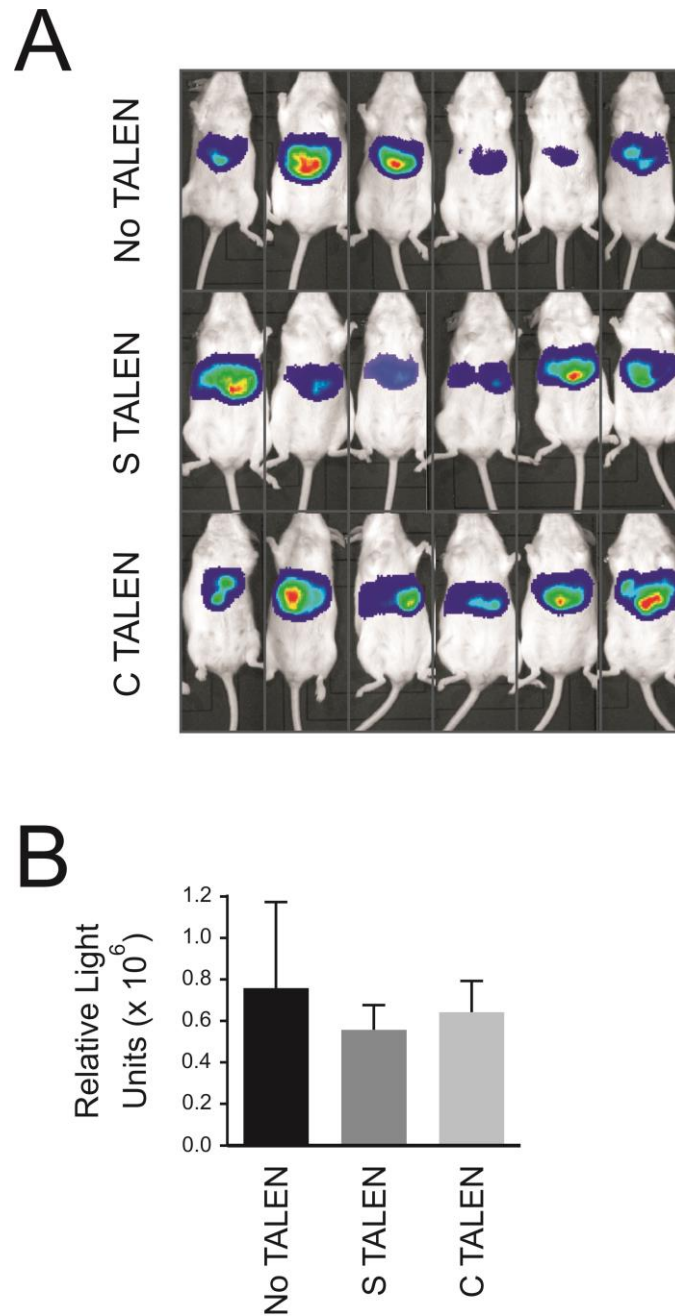

**Figure S8.** Equivalent reporter gene expression in groups of mice that were subjected to HDI.

**A.** Each animal from the three groups of mice was subjected to bioluminescence imaging following injection of the TALENs, HBV sequences and a Firefly luciferase-encoding plasmid. **B.** Mean relative light units emitted from the hepatic region was determined for each of the groups of animals. Values are presented as the means with error bars indicating standard deviations.

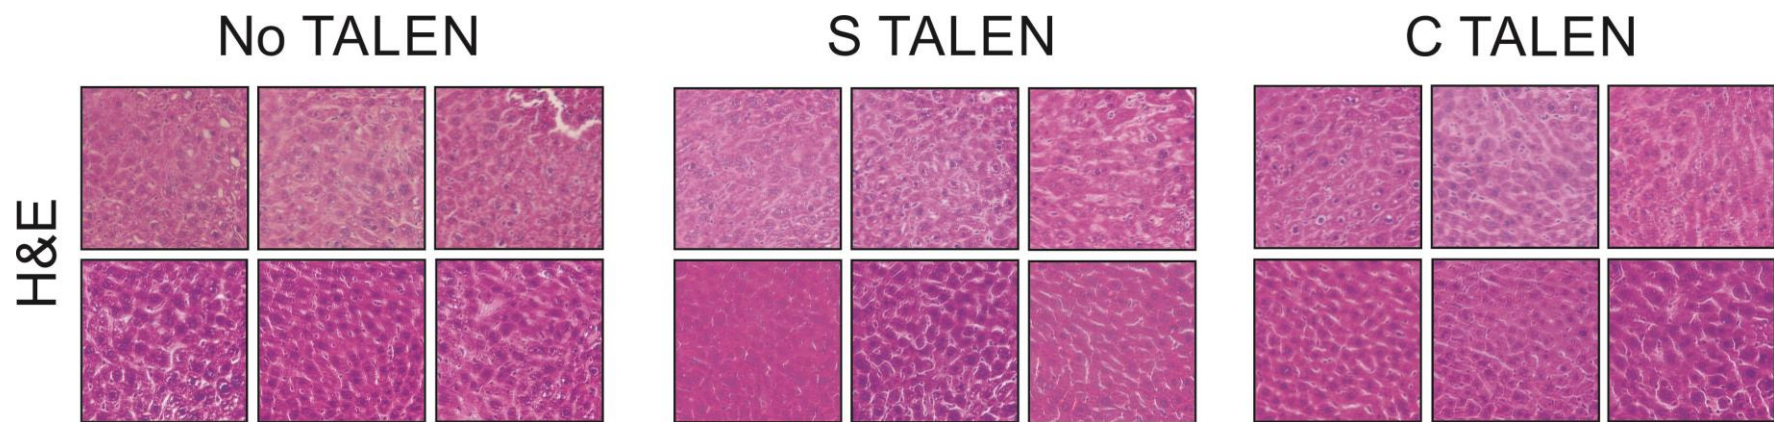

**Figure S9.** Representative liver histology (hematoxylin and eosin staining) obtained from liver sections of each animal that had been subjected to HDI with or without TALEN-expressing plasmids. Low power fields (100 ×) are shown.

**Table S1.** BLAST analysis of the *Mus musculus* genome to identify potential binding sites of combined and individual left and right subunits (SL and SR) of the S TALEN.

| Potential combined SL and SR sites | Chrom. No. | Nucleotide Range                                                                                                                                             | S TALEN Sites                                                                                                                          |                                                   | Identities <sup>#</sup>                                     | Sequence ID    |
|------------------------------------|------------|--------------------------------------------------------------------------------------------------------------------------------------------------------------|----------------------------------------------------------------------------------------------------------------------------------------|---------------------------------------------------|-------------------------------------------------------------|----------------|
|                                    |            |                                                                                                                                                              | SL                                                                                                                                     | SR                                                |                                                             |                |
|                                    |            |                                                                                                                                                              | <i>TCCTGCTGCTATGCCTCAT</i><br>AGGACGACGATACGGAGTA                                                                                      | <i>CTTCTGGACTATCAAGGTA</i><br>GAAGACCTGATAGTTCCAT |                                                             |                |
|                                    | 6          | 6830661 to 6830677<br>11962065 to 11962080<br>41232469 to 41232483                                                                                           | ●CCTGCTGCTATGCCTCA●*<br>TCCTGCTGCTATGCCT●●●                                                                                            | CTTCTGGACTATCAA●●●●                               | 17/19<br>16/19<br>15/19                                     | NW_001030820.1 |
|                                    | 4          | 44188029 to 44188045<br>31532806 to 31532820<br>8318087 to 8318104<br>36732721 to 36732735                                                                   | ●●CTGCTGCTATGCCTCAT<br>●CCTGCTGCTATGCCT●●●<br>●CCTGCTGCTA●GCCTCAT                                                                      | ●TTCTGGACTATCAAG●●●                               | 17/19<br>15/19<br>15/19<br>17/19                            | NT_187032.1    |
|                                    | 4          | 22544951 to 22544966<br>10954765 to 10954779                                                                                                                 | TCCTGCTGCTATGCCT●●●                                                                                                                    | ●●●●TGGACTATCAAGGTA                               | 16/19<br>15/19                                              | NT_187033.1    |
|                                    | 8          | 9218161 to 9218176<br>26838227 to 26838244                                                                                                                   | TCCTGCTGCTATGCCT●●●                                                                                                                    | ●TTCTGGA●TATCAAGGTA                               | 16/19<br>17/19                                              | NT_078575.7    |
|                                    | 9          | 3697632 to 3697647<br>44495841 to 44495855                                                                                                                   | TCCTGCTGCTATGCCT●●●                                                                                                                    | CTTCTGGACTATCAA●●●●                               | 16/19<br>15/19                                              | NT_039474.8    |
|                                    | 13         | 1175041 to 1175059<br>4966540 to 4966554                                                                                                                     | TCCTGCTGCT●TGCCTCAT                                                                                                                    | ●●●●TGGACTATCAAGGTA                               | 18/19<br>15/19                                              | NW_001030529.1 |
|                                    | 9          | 43318590 to 43318605<br>44102972 to 44102987<br>10709989 to 10710005                                                                                         | TCCTGCTGCTATGCCT●●●<br>TCCTGCTGCTATGCCT●●●                                                                                             | CTTCTGGACTA●CAAGG●●                               | 16/19<br>16/19<br>16/19                                     | NW_001030907.1 |
|                                    | 7          | 1111381 to 1111396<br>38299233 to 38299248<br>53113291 to 53113306<br>50396556 to 50396574<br>2339469 to 2339486<br>8016639 to 8016656<br>2033241 to 2033255 | TCCTGCTGCTATGCCT●●●<br>TCCTGCTGCTATGCCT●●●<br>TCCTGCTGCTATGCCT●●●<br>TCCTGCTGCT●TGCCTCAT<br>TCCTGCTGCTATG●CTCA●<br>TCCTGCTGCT●TGCCTCA● | CTTCTGGACTATCAA●●●●                               | 16/19<br>16/19<br>16/19<br>18/19<br>17/19<br>17/19<br>15/19 | NT_039433.8    |
|                                    | 3          | 41300341 to 41300356<br>27971181 to 27971195<br>66053798 to 66053816                                                                                         | TCCTGCTGCTATGCCT●●●                                                                                                                    | ●TTCTGGACTATCAAG●●●<br>CTTCTGG●CTATCAAGGTA        | 16/19<br>15/19<br>18/19                                     | NT_039240.8    |
|                                    | 17         | 69593674 to 69593692<br>30114485 to 30114500                                                                                                                 | TCCTGCT●CTATGCCTCAT                                                                                                                    | ●●TCTGGACTATCAAGGT●                               | 18/19<br>16/19                                              | NT_039649.8    |

|                               |    |                                                                      |                                                                   |                                                                       |                         |                |
|-------------------------------|----|----------------------------------------------------------------------|-------------------------------------------------------------------|-----------------------------------------------------------------------|-------------------------|----------------|
| Potential individual SL sites | 13 | 17430998 to 17431014<br>2227826 to 2227841                           | TCCTGCTGCTATGCCT●●<br>TCCTGCTGCTATGCCT●●●                         |                                                                       | 17/19<br>16/19          | NW_001030517.1 |
|                               | 6  | 845523 to 845539<br>5969096 to 5969111                               | ●CCTGCTGCTATGCCTCA●<br>TCCTGCTGCTATGCCT●●●                        |                                                                       | 17/19<br>16/19          | NT_039360.8    |
|                               | 4  | 12854748 to 12854763<br>25385538 to 25385553                         | TCCTGCTGCTATGCCT●●●<br>TCCTGCTGCTATGCCT●●●                        |                                                                       | 16/19<br>16/19          | NT_039264.7    |
|                               | 9  | 36145333 to 36145348<br>36938186 to 36938201                         | TCCTGCTGCTATGCCT●●●<br>TCCTGCTGCTATGCCT●●●                        |                                                                       | 16/19<br>16/19          | NT_039472.8    |
|                               | 14 | 28926064 to 28926081<br>60263242 to 60263256                         | ●CCTGCTGCTATGCCTCAT<br>●CCTGCTGCTATGCCT●●●                        |                                                                       | 18/19<br>15/19          | NT_039606.8    |
|                               | 19 | 49262317 to 49262333<br>2286312 to 2286326<br>15839462 to 15839476   | TCCTGCTGCTATGCCTC●●<br>●●CTGCTGCTATGCCTC●●<br>TCCTGCTGCTATGCC●●●● |                                                                       | 17/19<br>15/19<br>15/19 | NT_039687.8    |
|                               | 7  | 22820518 to 22820533<br>37540231 to 37540246<br>34806807 to 34806825 | TCCTGCTGCTATGCCT●●●<br>TCCTGCTGCTATGCCT●●●<br>TCCTGCTGCT●TGCCTCAT |                                                                       | 16/19<br>16/19<br>18/19 | NW_001030877.1 |
|                               | 11 | 55118539 to 55118554<br>60207885 to 60207900                         | TCCTGCTGCTATGCCT●●●<br>TCCTGCTGCTATGCCT●●●                        |                                                                       | 16/19<br>16/19          | NT_096135.6    |
| Potential individual SR sites | 3  | 27971181 to 27971195<br>66053798 to 66053816                         |                                                                   | ●TTCTGGACTATCAAG●●●<br>CTTCTGG●CTATCAAGGTA                            | 15/19<br>18/19          | NT_039240.8    |
|                               | 11 | 8445188 to 8445204<br>12712726 to 12712742                           |                                                                   | CTTCTGG●CTATCAAGG●●<br>●TTCTG●ACTATCAAGGT●                            | 16/19<br>16/19          | NW_001030434.1 |
|                               | 2  | 16581880 to 16581894<br>25991220 to 25991236<br>68974756 to 68974772 |                                                                   | CTTCTGGACTATCAA●●●●<br>●TTCTG●ACTATCAAGGT●<br>CTTCTGGACT●TCAAGG●●     | 15/19<br>16/19<br>16/19 | NT_039207.8    |
|                               | 16 | 61477073 to 61477087<br>36662006 to 36662022<br>71304901 to 71304917 |                                                                   | ●TTCTGGACTATCAAG●●●<br><br>CTTCTGGACTA●CAAGG●●<br>●TTCTGGA●TATCAAGGT● | 15/19<br>16/19<br>16/19 | NW_001030584.1 |
|                               | 19 | 26586727 to 26586741<br>26777773 to 26777787<br>26955911 to 26955925 |                                                                   | CTTCTGGACTATCAA●●●●<br>CTTCTGGACTATCAA●●●●<br>CTTCTGGACTATCAA●●●●     | 15/19<br>15/19<br>15/19 | NT_039687.8    |

#A minimum sequence identity between TALEN subunit cognates and sites within the *Mus musculus* genome of 15 out of 19 sense or antisense nucleotides was used as a cut off.

\*Mismatches between the TALEN subunit cognates and the aligned sequence in the *Mus musculus* genome are indicated by ‘●’.

**Table S2.** BLAST analysis of the human genome to identify potential binding sites of combined and individual left and right subunits (SL and SR) of the S TALEN.

| Potential combined SL and SR sites | Chrom. No. | Nucleotide Range                                                                                                                           | S TALEN Sites                                                    |                                                                   | Identities                                         | Sequence ID    |
|------------------------------------|------------|--------------------------------------------------------------------------------------------------------------------------------------------|------------------------------------------------------------------|-------------------------------------------------------------------|----------------------------------------------------|----------------|
|                                    |            |                                                                                                                                            | SL                                                               | SR                                                                |                                                    |                |
|                                    |            |                                                                                                                                            | <i>TCCTGCTGCTATGCCTCAT</i><br>AGGACGACGATACGGAGTA                | <i>CTTCTGGACTATCAAGGTA</i><br>GAAGACCTGATAGTTCCAT                 |                                                    |                |
|                                    | 5          | 5316824 to 5316838<br>1348622 to 1348638                                                                                                   | ●●CTGCTGCTATGCCTC●●                                              | ●TTCTGGACTATC●AGGT●                                               | 15/19<br>16/19                                     | NW_004078023.1 |
|                                    | 6          | 16508260 to 16508274<br>36973928 to 36973944<br>28906310 to 28906326<br>66068358 to 66068374                                               | ●●CTGCTGCTATGCCTC●●<br>●●CTGCTGCTAT●CCTCAT                       | ●TTCTGGACTAT●AAGGT●<br>●TTCTGGACTATC●AGGT●                        | 15/19<br>16/19<br>16/19<br>16/19                   | NW_004078028.1 |
|                                    | 3          | 52993974 to 52993988<br>81226837 to 81226851<br>9589025 to 9589042                                                                         | TCCTGCTGCTATGCC●●●●<br>●●●TGCTGCTATGCCTCA●                       | ●TTCTGGA●TATCAAGGTA                                               | 15/19<br>15/19<br>17/19                            | NT_005612.16   |
|                                    | 17         | 28496793 to 28496807<br>35558057 to 35558074<br>13845926 to 13845940                                                                       | ●●●●GCTGCTATGCCTCAT<br>●CCTGCTGCT●TGCTCAT                        | ●●●●TGGACTATCAAGGTA                                               | 15/19<br>17/19<br>15/19                            | NT_010783.15   |
|                                    | 16         | 9515596 to 9515610<br>10180724 to 10180741<br>20197304 to 20197318                                                                         | ●●●TGCTGCTATGCCTCA●                                              | CTTCTGGACTATCAAGGT●<br>●●●●TGGACTATCAAGGTA                        | 15/19<br>18/19<br>15/19                            | NT_010393.16   |
|                                    | 4          | 28481514 to 28481528<br>86675613 to 86675630<br>5401736 to 5401752<br>26630796 to 26630810<br>91203543 to 91203560<br>42836405 to 42836421 | TCCTGCTGCTATGCC●●●●<br>●CCTGCTGCT●TGCTCAT<br>TCCTGCTGC●ATGCCTC●● | ●●●●TGGACTATCAAGGTA<br>●TTCTGGACTAT●AAGGTA<br>CTTCTG●ACTATCAAGG●● | 15/19<br>17/19<br>16/17<br>15/19<br>17/19<br>16/19 | NT_016354.19   |
|                                    | 19         | 8260049 to 8260063<br>5398156 to 5398173                                                                                                   | TCCTGCTGCTATGCC●●●●                                              | CTTCT●GACTATCAAGGT●                                               | 15/19<br>17/19                                     | NT_011109.16   |
|                                    | 9          | 32244124 to 32244141<br>26866298 to 26866315                                                                                               | ●CCTGCTGCTA●GCCTCAT                                              | CTTCTGGA●TATCAAGGT●                                               | 17/19<br>17/19                                     | NT_008413.18   |
|                                    | 1          | 61198693 to 61198710<br>11611961 to 11611975<br>47930542 to 47930556<br>66083096 to 66083110                                               | TCCTGCTGCT●TGCTCA●                                               | ●●TCTGGACTATCAAGG●●<br>●●●CTGGACTATCAAGGT●<br>●●●CTGGACTATCAAGGT● | 17/19<br>15/19<br>15/19<br>15/19                   | NT_032977.9    |

|                               |    |                                                                                              |                                                                                         |                                                                                            |                                  |                |
|-------------------------------|----|----------------------------------------------------------------------------------------------|-----------------------------------------------------------------------------------------|--------------------------------------------------------------------------------------------|----------------------------------|----------------|
|                               | 6  | 10893712 to 10893726<br>9894805 to 9894819<br>14658716 to 14658733                           | ●CCTGCTGCTATGCCT●●●                                                                     | ●TTCTGGACTATCAAG●●●<br>●TTCTGGACT●TCAAGGTA                                                 | 15/19<br>15/19<br>17/19          | NT_007299.13   |
| Potential individual SL sites | 22 | 13395721 to 13395736<br>23229742 to 23229758<br>26356393 to 26356409<br>30107958 to 30107974 | ●CCTGCTGCTATGCCTC●●<br>TCCTGCTGCTAT●CCTC●●<br>TCCTGCTGCT●TGCCTC●●<br>●CCTGCTGCT●TGCCTCA |                                                                                            | 16/19<br>16/19<br>16/19<br>16/19 | NW_004078112.1 |
|                               | 15 | 69598949 to 69598963<br>7011373 to 7011389<br>42322452 to 42322468                           | ●CCTGCTGCTATGCCT●●●<br>●●CTGCTGCT●TGCCTCAT<br>●●CTGCTGCTAT●CCTCAT●                      |                                                                                            | 15/19<br>16/19<br>16/19          | NW_004078084.1 |
|                               | 17 | 12292150 to 12292164<br>5230569 to 5230586                                                   | ●●●●GCTGCTATGCCTCAT<br>●CCTGCTGCT●TGCCTCAT                                              |                                                                                            | 15/19<br>17/19                   | NW_001838454.2 |
|                               | 3  | 11943588 to 11943602<br>20444778 to 20444795<br>1113755 to 1113771                           | ●CCTGCTGCTATGCCT●●●<br>TCCTGCTGCTAT●CCTCA●<br>●●CTGCTGCTATGC●TCAT                       |                                                                                            | 15/19<br>17/19<br>16/19          | NW_001838877.2 |
|                               | 11 | 3402649 to 3402663<br>21709223 to 21709239                                                   | ●●CTGCTGCTATGCCTC●●<br>TCCTGCTGCT●TGCCTC●●                                              |                                                                                            | 15/19<br>16/19                   | NT_033899.8    |
|                               | 6  | 16509724 to 16509738<br>36971717 to 36971733                                                 | ●●CTGCTGCTATGCCTC●●<br>●●CTGCTGCTAT●CCTCAT                                              |                                                                                            | 15/19<br>16/19                   | NT_025741.15   |
| Potential individual SR sites | 13 | 67246550 to 67246566<br>36698126 to 36698140<br>37005816 to 37005830<br>32823986 to 32824003 |                                                                                         | CCTTCTGGACTATCAAGG●●<br>CCTTCTGGACTATCAA●●●●<br>●●●CTGGACTATCAAGGT●<br>●TTCTGGA●TATCAAGGTA | 17/19<br>15/19<br>15/19<br>17/19 | NT_024524.14   |
|                               | 21 | 8582147 to 8582162<br>26035956 to 26035973                                                   |                                                                                         | ●●●CTGGACTATCAAGGTA<br>CCTTCTGGACTATC●AGGT●                                                | 16/19<br>17/19                   | NT_011512.11   |
|                               | 12 | 2866821 to 2866835<br>485378 to 485394                                                       |                                                                                         | ●●●CTGGACTATCAAGGT●<br>●●TTCTGGACTATCCAGGT●                                                | 15/19<br>16/19                   | NW_001838060.2 |
|                               | 1  | 5704171 to 5704185<br>23791575 to 23791591                                                   |                                                                                         | ●●●CTGGACTATCAAGGT●<br>CCTTCTGGACTA●CAAGG●●                                                | 15/19<br>16/19                   | NW_001838579.2 |
|                               | 9  | 49639304 to 49639318<br>30386318 to 30386335                                                 |                                                                                         | ●TTCTGGACTATCAAG●●●<br>●TTCTGGACTA●CAAGGTA                                                 | 15/19<br>17/19                   | NT_008470.19   |

#A minimum sequence identity between TALEN subunit cognates and sites within the human genome of 15 out of 19 sense or antisense nucleotides was used as a cut off.

\*Mismatches between the TALEN subunit cognates and the aligned sequence in the human genome are indicated by ‘●’.

**Table S3.** BLAST analysis of the *Mus musculus* genome to identify potential binding sites of combined and individual left and right subunits (CL and CR) of the C TALEN.

| Potential combined CL and CR sites | Chrom. No.                                                                                                          | Nucleotide Range                                                                             | C TALEN Sites                                                                           |                                                   | Identities                       | Sequence ID    |
|------------------------------------|---------------------------------------------------------------------------------------------------------------------|----------------------------------------------------------------------------------------------|-----------------------------------------------------------------------------------------|---------------------------------------------------|----------------------------------|----------------|
|                                    |                                                                                                                     |                                                                                              | CL                                                                                      | CR                                                |                                  |                |
|                                    |                                                                                                                     |                                                                                              | <i>TATCAACTTCCGGAGAC</i><br>ATAGTTGTGAAGGCCTCTG                                         | <i>CGACGAGGCAGGTCCCCTA</i><br>GCTGCTCCGTCCAGGGGAT |                                  |                |
| Potential combined CL and CR sites | 5                                                                                                                   | 18010816 to 18010830<br>19827052 to 19827066<br>16218494 to 16218508                         | ●●TCAAACTTCCGGAG●●<br>●●TCAAACTTCCGGAG●●                                                | ●●●●GAGGCAGGTCCCCTA                               | 15/19<br>15/19<br>15/19          | NW_001030796.1 |
|                                    | 9                                                                                                                   | 47261339 to 47261354<br>7863713 to 7863727                                                   | TATCAA●ACTTCCGGA●●●                                                                     | ●●●●GAGGCAGGTCCCCTA                               | 15/19<br>15/19                   | NT_039474.8    |
|                                    | 17                                                                                                                  | 38384398 to 38384414<br>43566525 to 43566540<br>70416673 to 70416687                         | ●ATCAAACTTCC●GAGA●<br>●●●CAAACTTCC●AGAC                                                 | ●●●●GAGGCAGGTCCCCTA                               | 16/19<br>15/19                   | NT_039649.8    |
|                                    |                                                                                                                     |                                                                                              | 15/19                                                                                   |                                                   |                                  |                |
| Potential CL sites                 | 3                                                                                                                   | 38866300 to 38866314<br>53841380 to 53841397<br>34012433 to 34012449<br>59437720 to 59437735 | ●ATCAAACTTCCGGA●●●<br>TATCA●CACTTCCGGAGA●<br>●●TCAA●ACTTCCGGAGAC<br>TATCA●CACTTCCGGA●●● |                                                   | 15/19<br>17/19<br>16/19<br>15/19 | NT_039240.8    |
|                                    | 5                                                                                                                   | 531836 to 531850<br>2348932 to 2348946                                                       | ●●TCAAACTTCCGGAG●●<br>●●TCAAACTTCCGGAG●●                                                |                                                   | 15/19<br>15/19                   | NT_078458.7    |
|                                    | 14                                                                                                                  | 6519500 to 6519514<br>6659119 to 6659133<br>6798768 to 6798782<br>26304835 to 26304850       | ●ATCAAACTTCCGGA●●●<br>●ATCAAACTTCCGGA●●●<br>●ATCAAACTTCCGGA●●●<br>●●●CAAACTTCC●GGAGAC   |                                                   | 15/19<br>15/19<br>15/19<br>15/19 | NT_039606.8    |
|                                    |                                                                                                                     |                                                                                              | 16/19                                                                                   |                                                   |                                  |                |
| 2                                  | 93924002 to 93924019<br>9619835 to 9619851<br>87013076 to 87013092                                                  | ●ATCAAACTTCC●GAGAC<br>TATCAAACTTCC●GGAG●●<br>●●TCAACAC●TCCGGAGAC                             |                                                                                         | 17/19<br>16/19<br>16/19                           | NT_039207.8                      |                |
| Potential CR sites                 | Sequences in the <i>Mus musculus</i> genome with 15 or more nucleotide identities to the CR cognate were not found. |                                                                                              |                                                                                         |                                                   |                                  |                |



#A minimum sequence identity between TALEN subunit cognates and sites within the *Mus musculus* genome of 15 out of 19 sense or antisense nucleotides was used as a cut off.

\*Mismatches between the TALEN subunit cognates and the aligned sequence in the *Mus musculus* genome are indicated by ‘●’.

**Table S4.** BLAST analysis of the human genome to identify potential binding sites of combined and individual left and right subunits (CL and CR) of the C TALEN.

| Potential combined CL and CR sites | Chrom. No. | Nucleotide Range                                                     | C TALEN Sites                                               |                                                 | Identities                                        | Sequence ID    |
|------------------------------------|------------|----------------------------------------------------------------------|-------------------------------------------------------------|-------------------------------------------------|---------------------------------------------------|----------------|
|                                    |            |                                                                      | CL                                                          | CR                                              |                                                   |                |
|                                    |            |                                                                      |                                                             | <i>TATCAACTTCCGGAGAC</i><br>ATAGTTGTGAAGGCCTCTG | <i>CGACGAGGCAGGTCCCCTA</i><br>GCTGCTCCGTCCAGGGGAT |                |
|                                    | 3          | 51696616 to 51696632<br>65720310 to 65720324                         | TATCAACTTC●GGAG●●                                           | ●●●●GAGGCAGGTCCCCTA                             | 16/17<br>15/19                                    | NT_022517.18   |
|                                    | 2          | 56850349 to 56850365<br>15604047 to 15604063                         | ●●TCAACTTC●GGAGAC                                           | ●GACGAGGCAGG●CCCCT●                             | 16/19<br>16/19                                    | NW_004078008.1 |
|                                    | 21         | 4560786 to 4560802<br>30289322 to 30289338                           | ●●TCAACTTC●GGAGAC                                           | CGAC●AGGCAGGTCCCC●●                             | 16/19<br>16/19                                    | NW_004078109.1 |
| Potential CL sites                 | 8          | 4869274 to 4869289<br>12795942 to 12795958                           | ●●●CAACTTCCGGAGAC<br>●●TCAACTTC●GGAGAC                      |                                                 | 16/19<br>16/19                                    | NT_167187.1    |
|                                    | 7          | 30035998 to 30036012<br>36477879 to 36477895<br>42858728 to 42858744 | ●●TCAACTTCCGGAG●●<br>TATCAACTTC●GGAG●●<br>●●TCAACTTC●GGAGAC |                                                 | 15/19<br>16/19<br>16/19                           | NT_007819.17   |
|                                    | 6          | 5016435 to 5016449<br>31733101 to 31733119                           | ●●TCAACTTCCGGAG●●<br>TATCAACTTCC●GAGAC                      |                                                 | 15/19<br>18/19                                    | NT_007592.15   |
|                                    | 3          | 30147609 to 30147625<br>55554086 to 55554102                         | TATCAACA●TTCCGGAG●●<br>●●TCAACTTC●GGAGAC                    |                                                 | 16/19<br>16/19                                    | NT_005612.16   |
| Potential CR sites                 | 2          | 553285 to 553301<br>830629 to 830645                                 |                                                             | ●GACGAGGCAGG●CCCCT●<br>●GACGAGGCAGG●CCCCT●      | 16/17<br>16/17                                    | NT_022135.16   |

#A minimum sequence identity between TALEN subunit cognates and sites within the human genome of 15 out of 19 sense or antisense nucleotides was used as a cut off.

\*Mismatches between the TALEN subunit cognates and the aligned sequence in the human genome are indicated by ‘●’.
